# Supplementary material for: A 16-week progressive exercise training intervention in treatment-naïve chronic lymphocytic leukaemia: a randomised-controlled pilot study
Source: PubMed Central journal article supplement (PMC11655450; doi:10.3389/fonc.2024.1472551), 2024-12-05

**Supplemental Figure 1.** Representative B-CLL flow cytometry analysis with a sample from a trial participant.

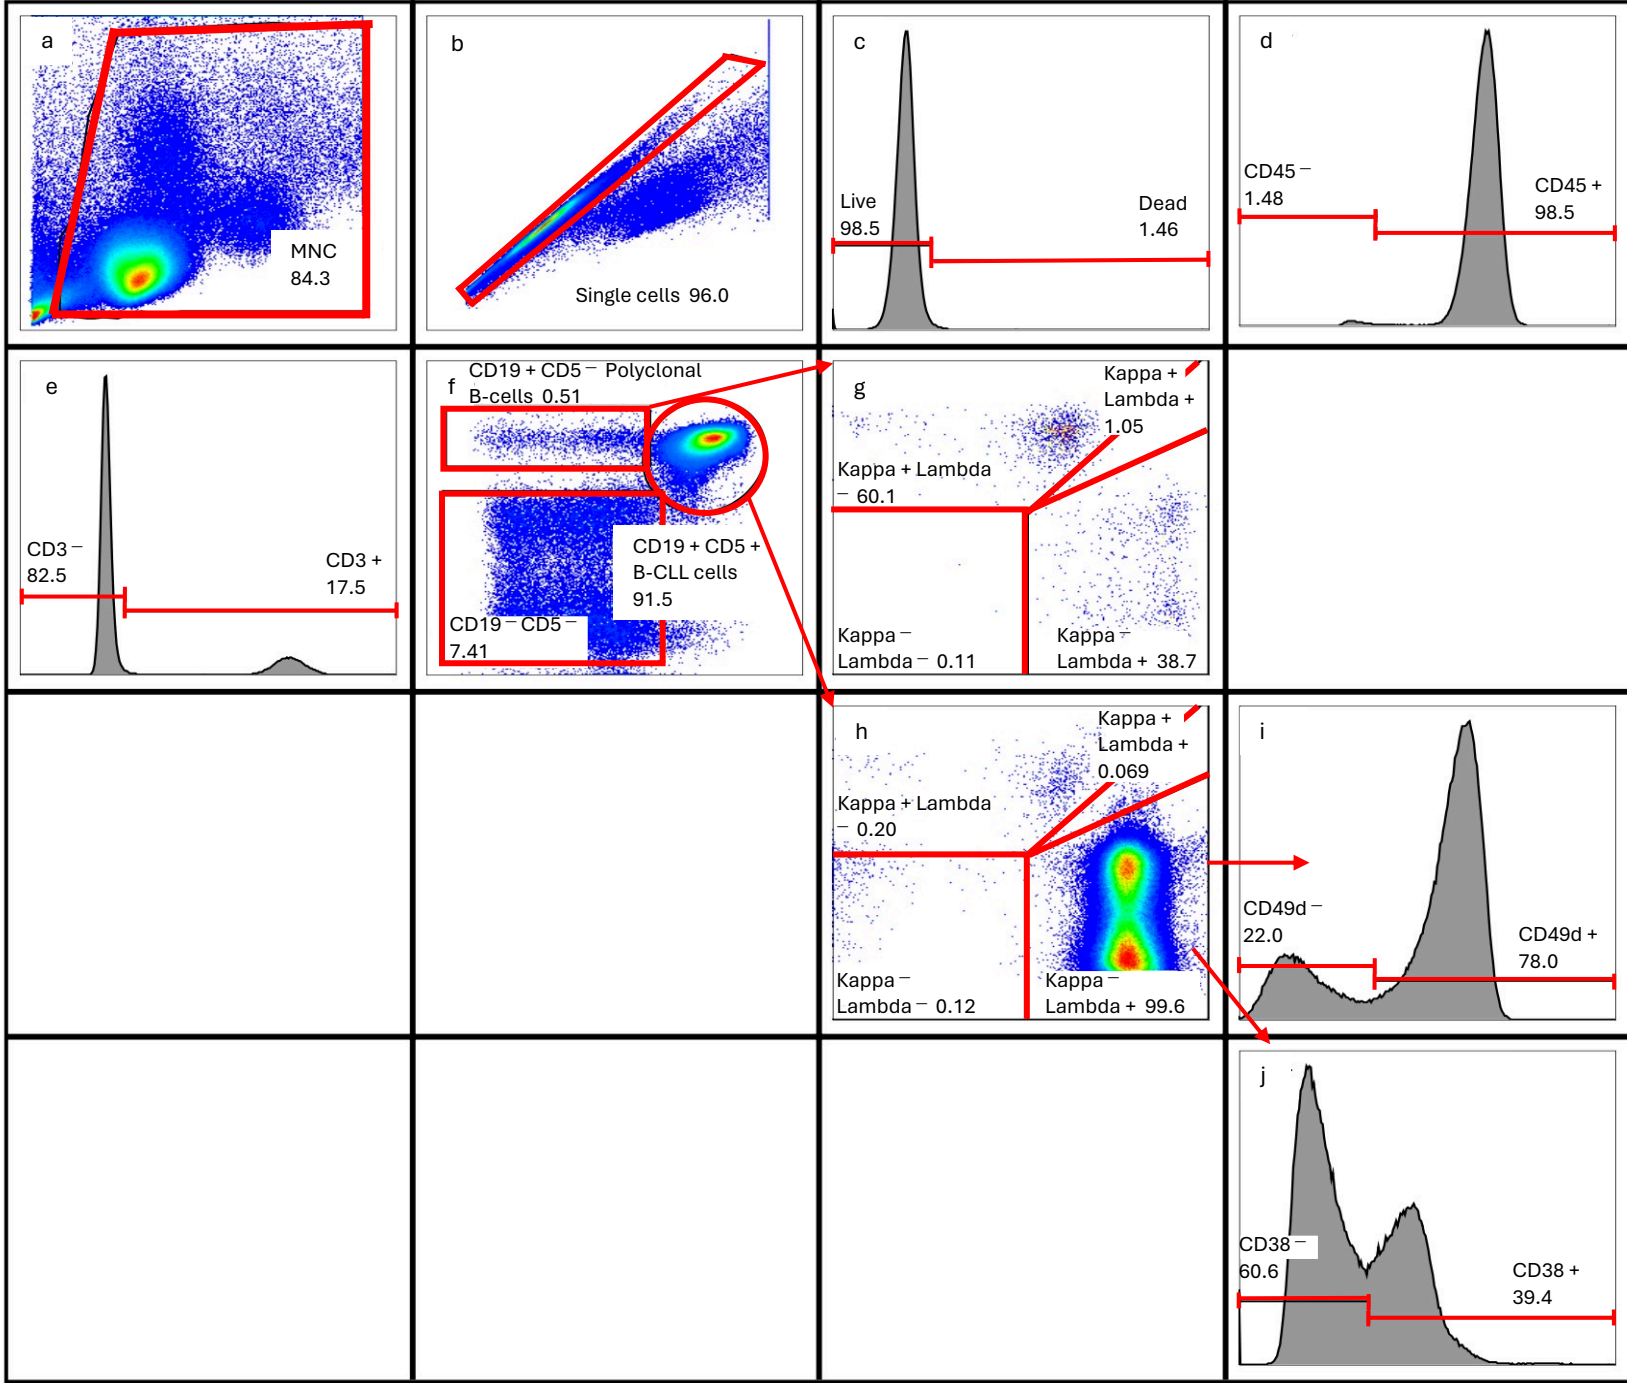

**Supplemental Figure 2.** Representative CD8+ T-cell flow cytometry analysis with a sample from a trial participant.

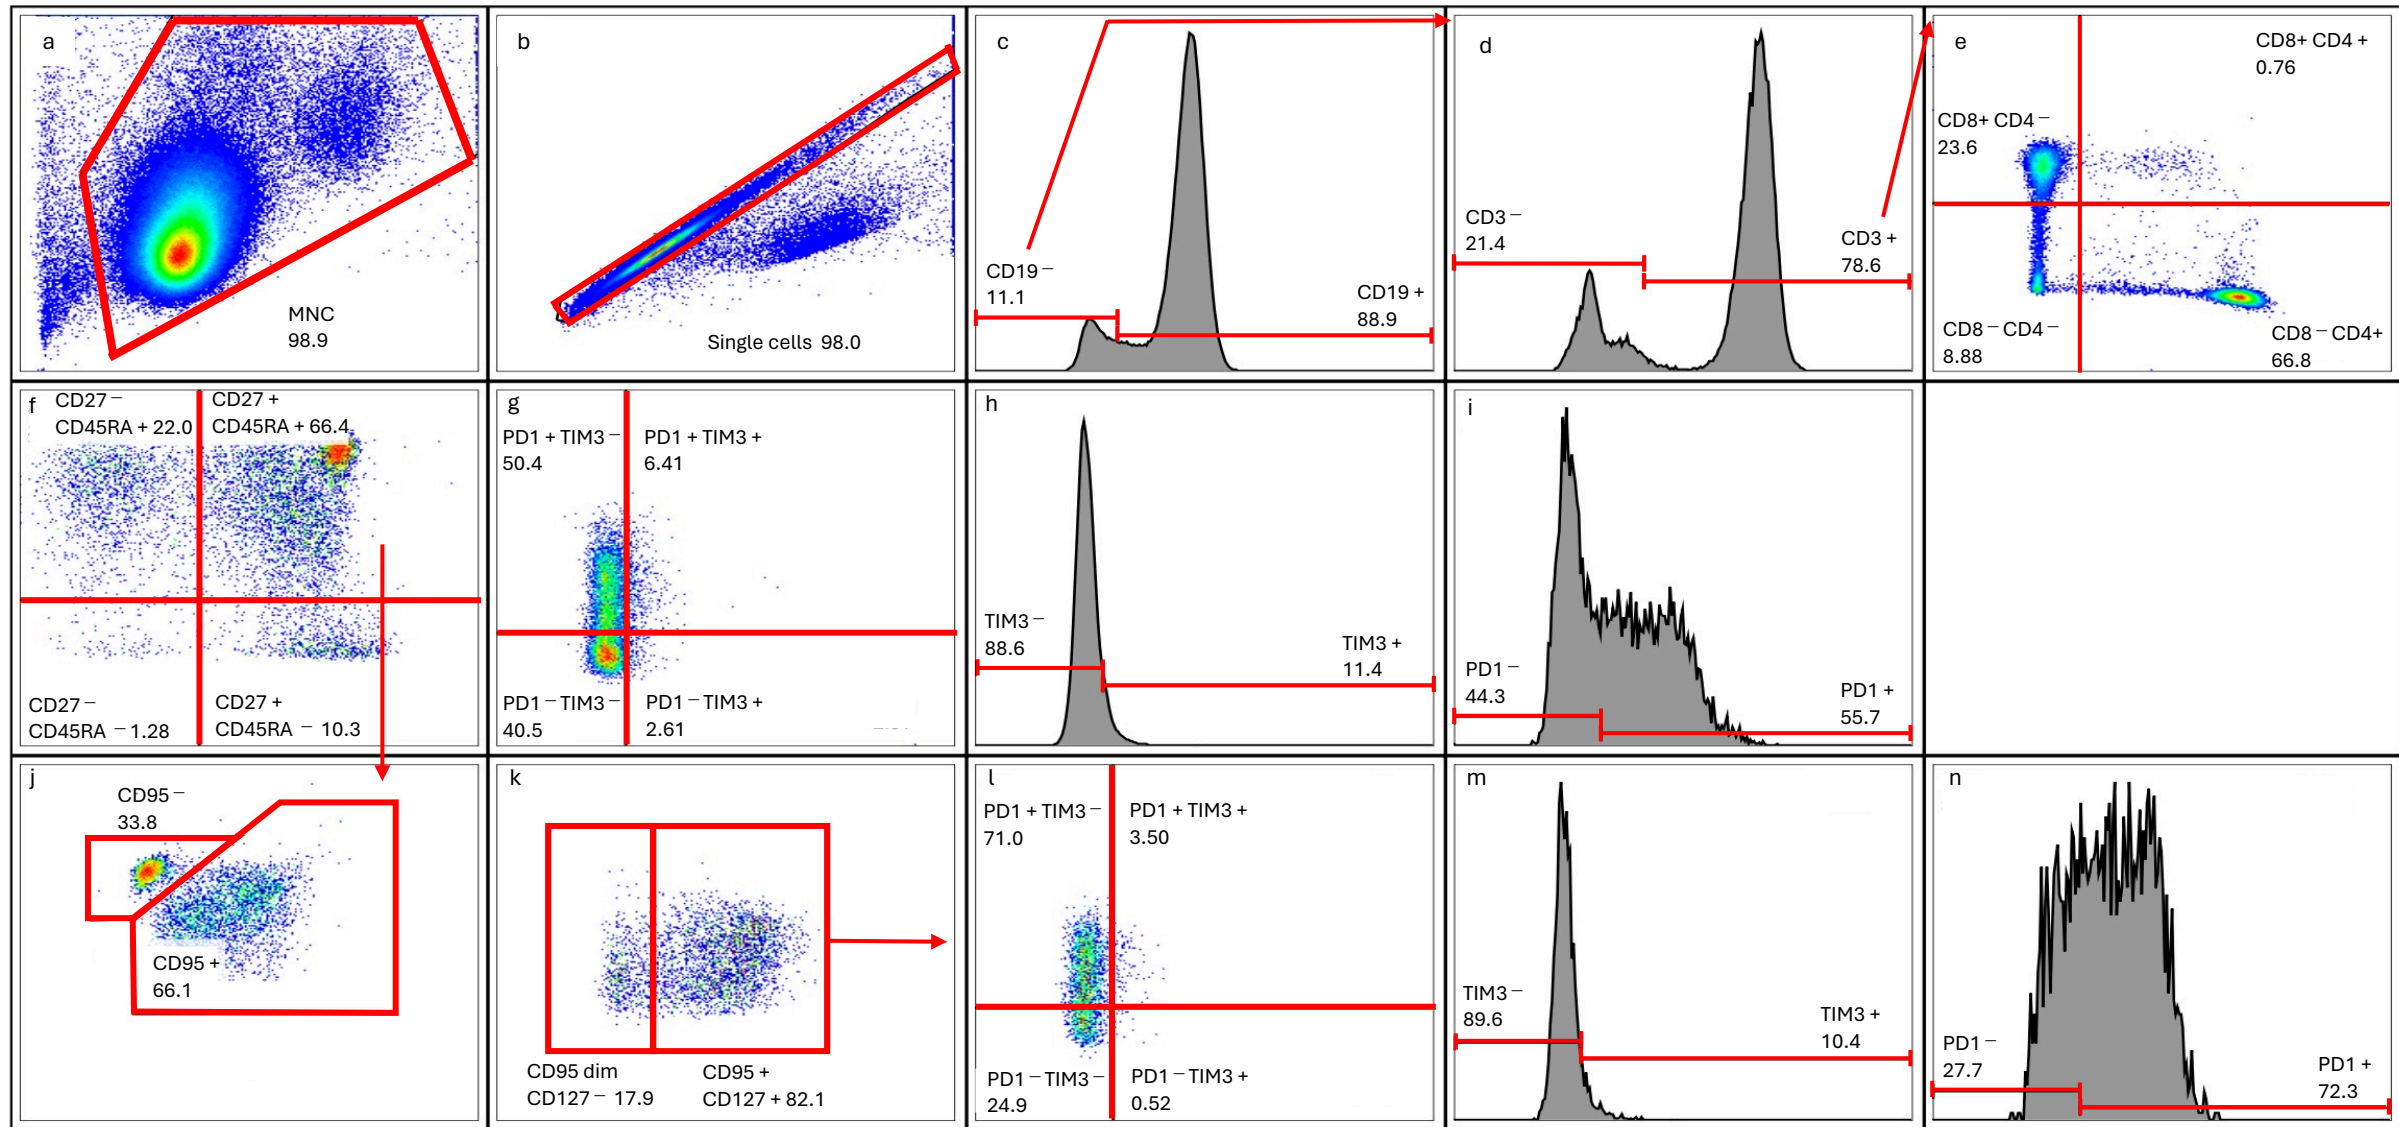

**Supplemental Figure 3. Representative CD4+ T-cell flow cytometry analysis with a sample from a trial participant.**

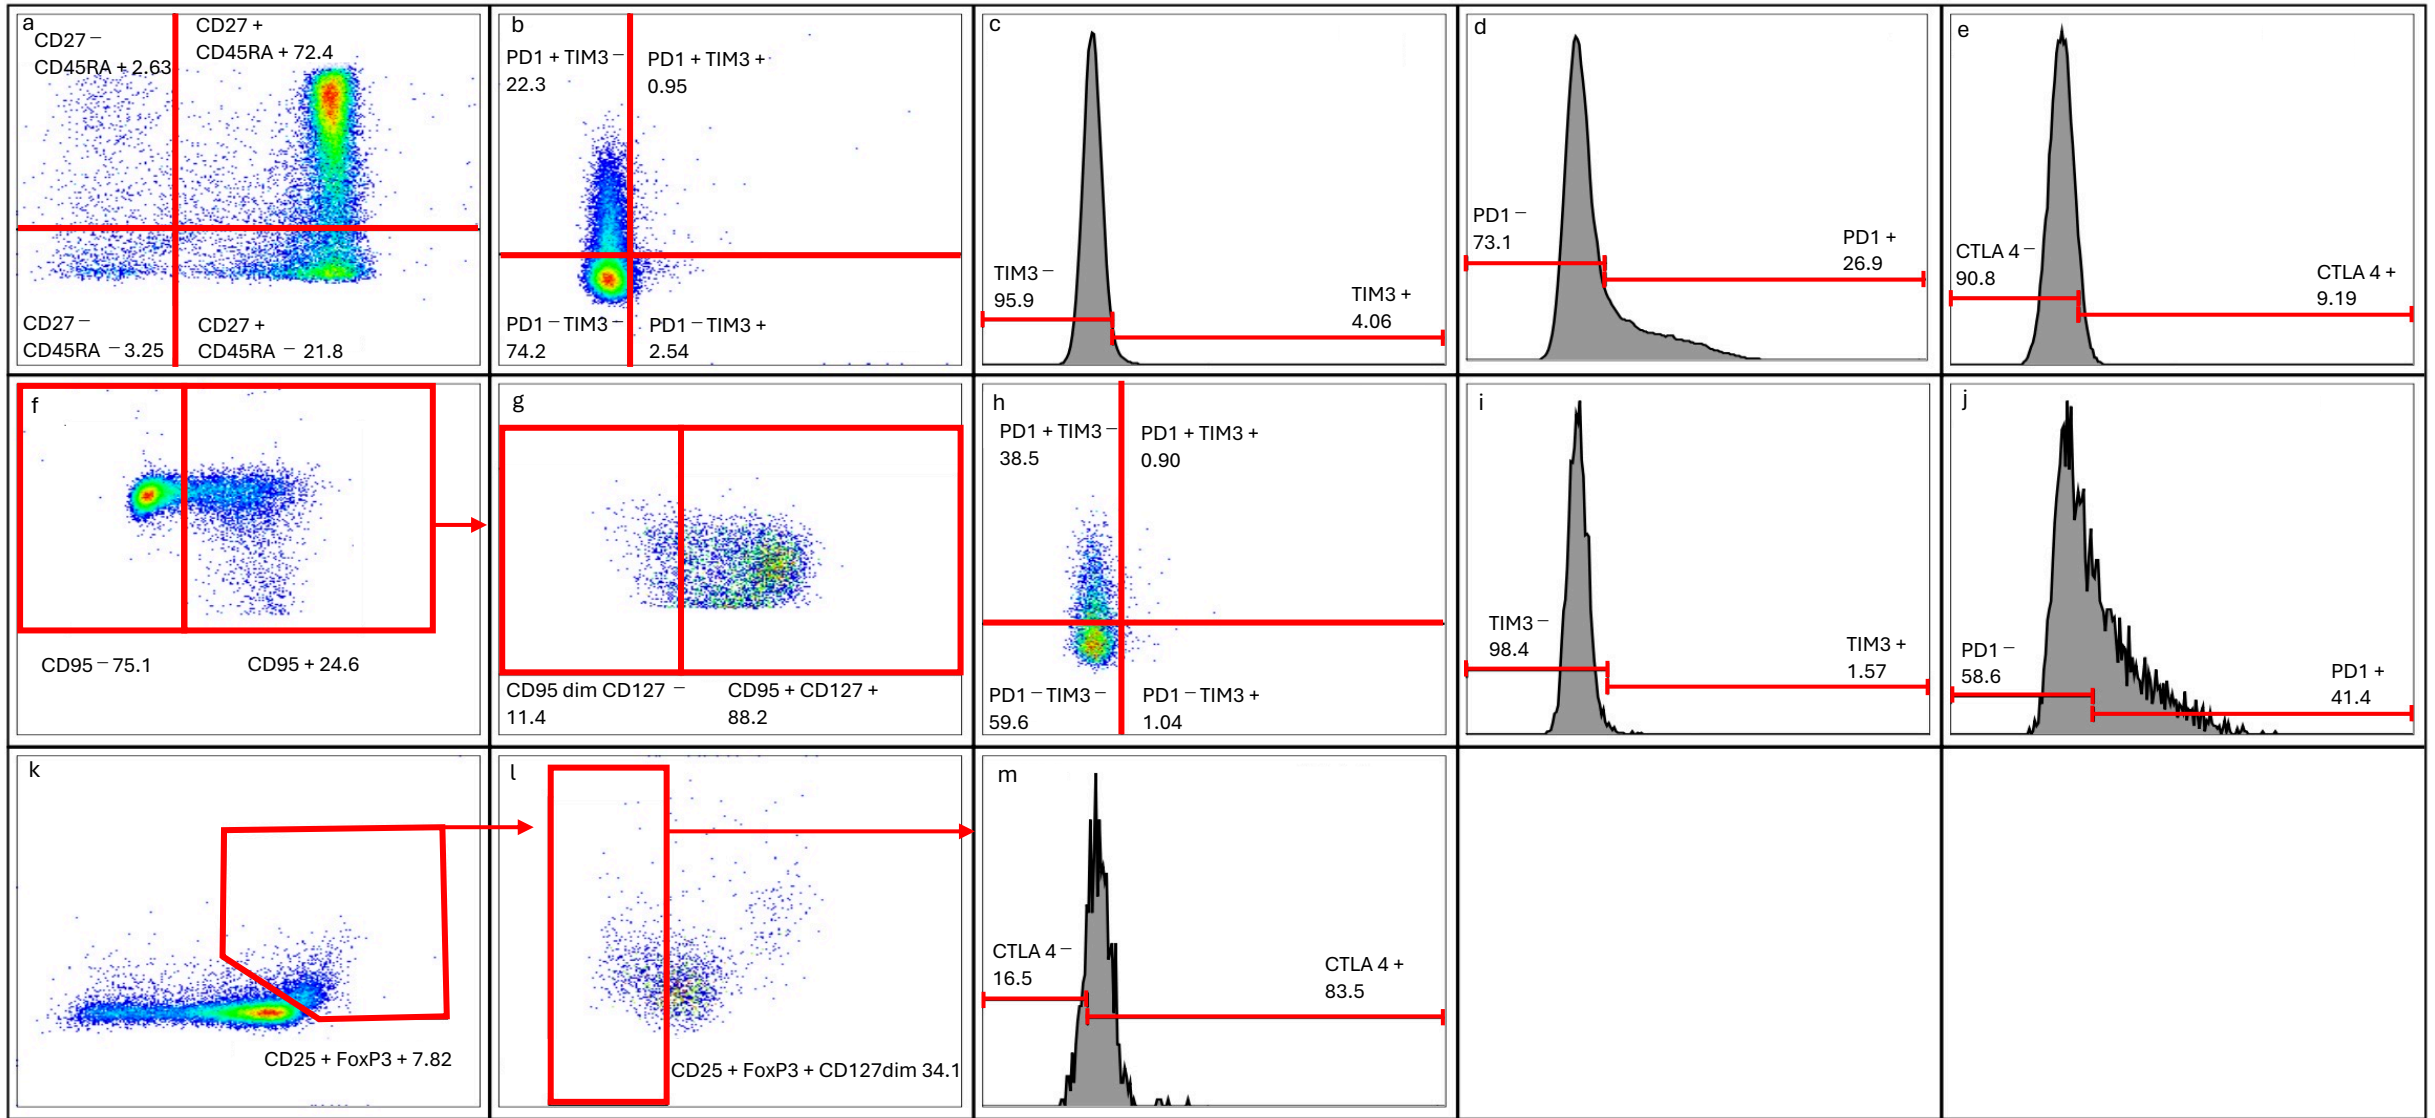

**Supplemental Figure 4.** Schematic diagram showing the structure of supervised and unsupervised exercise sessions, for the 16-week exercise program.

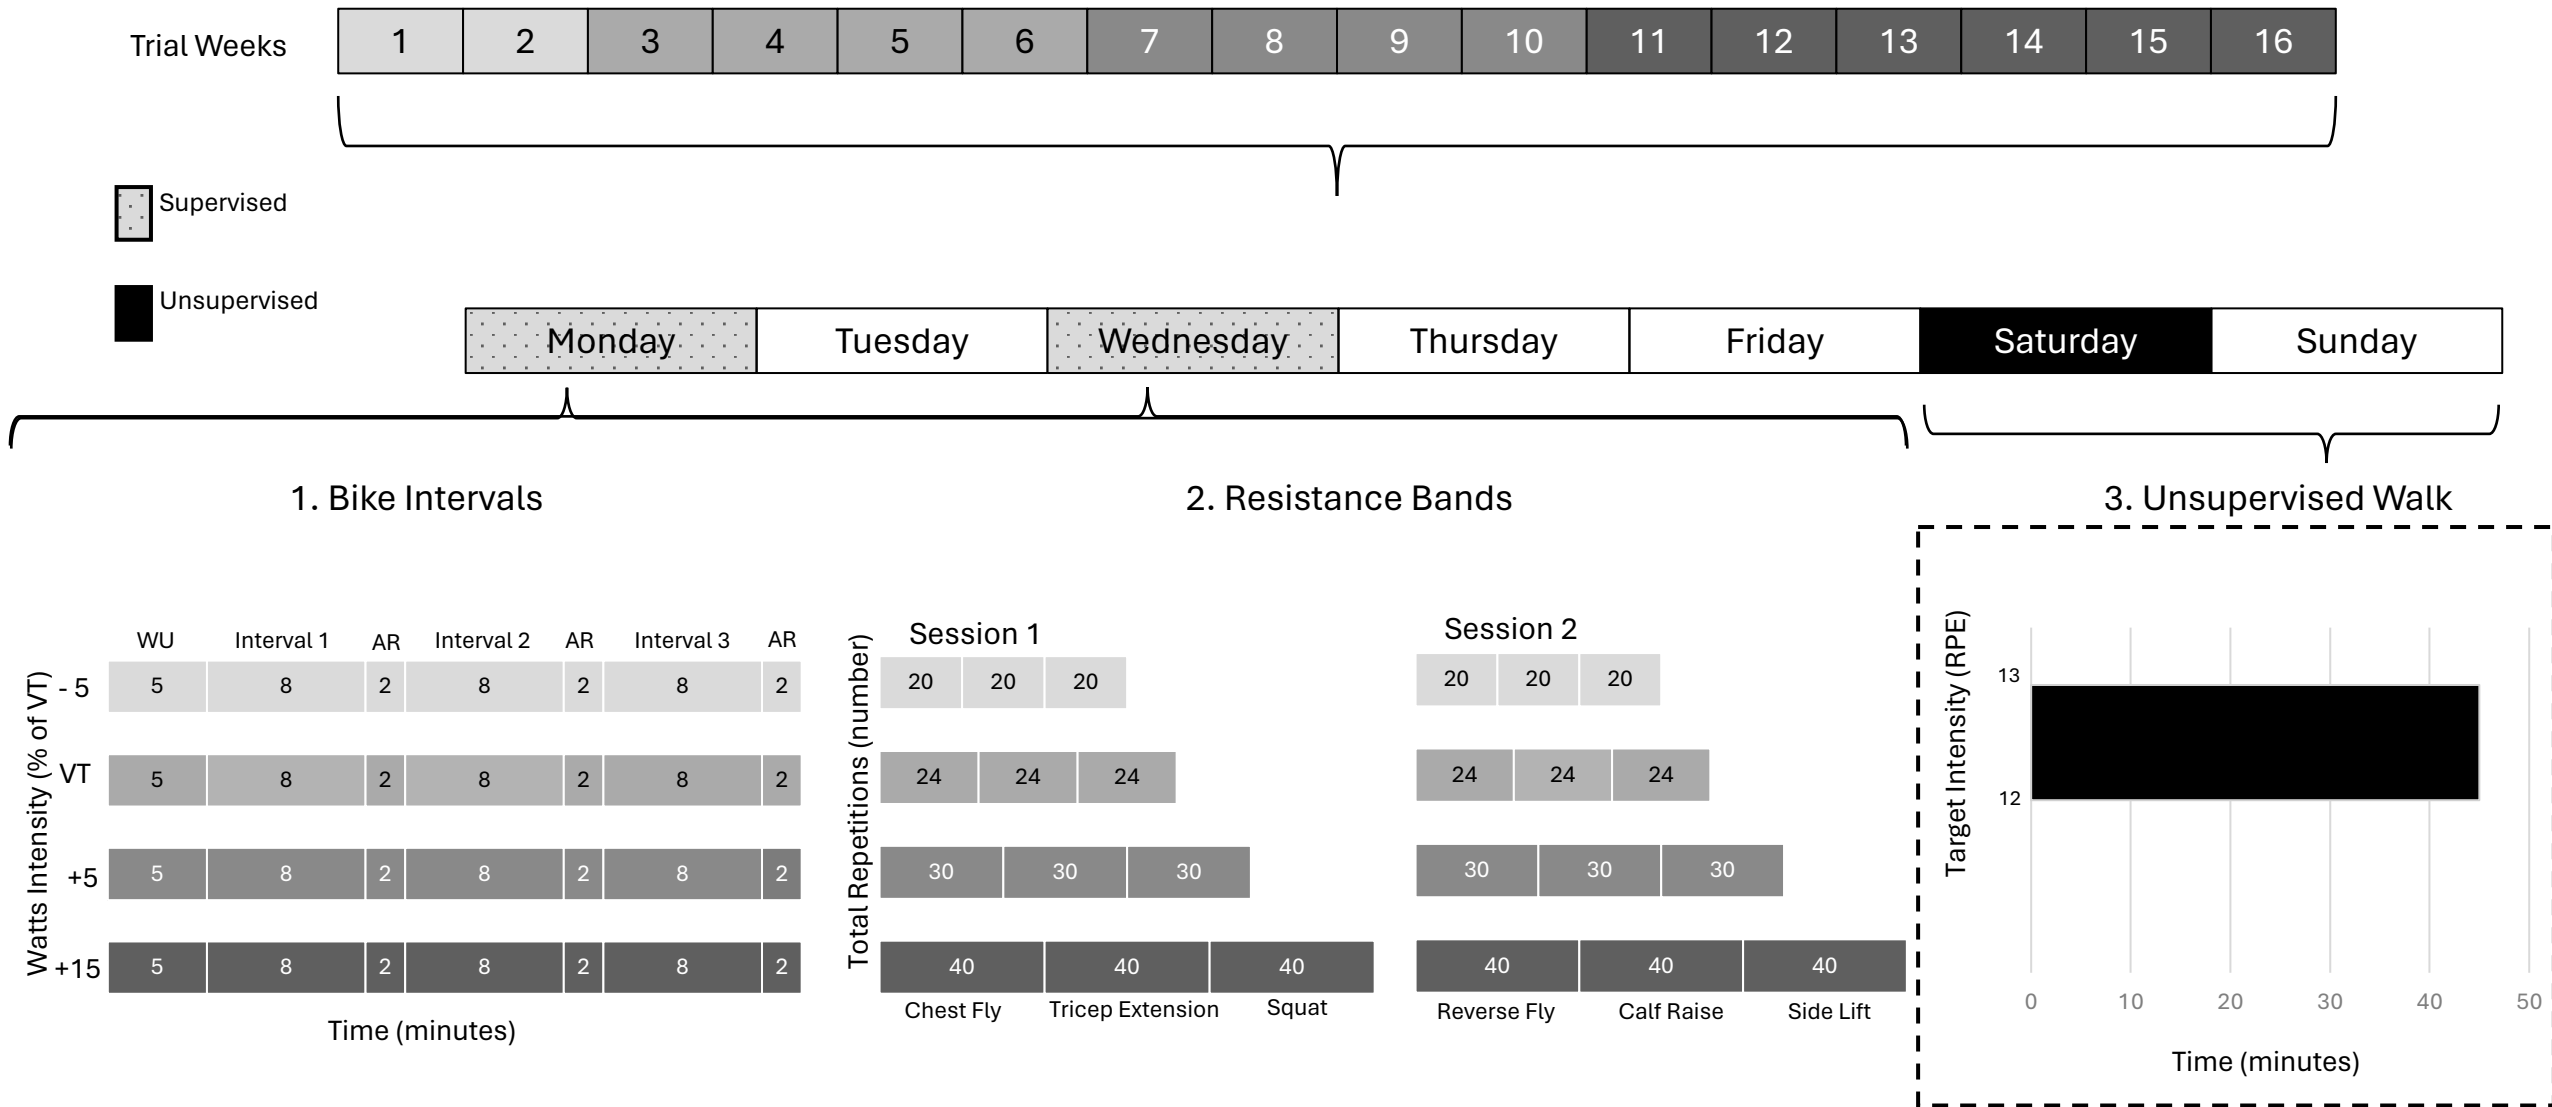

**Supplemental Figure 5.** Pre- to post-intervention changes to CLL cells.

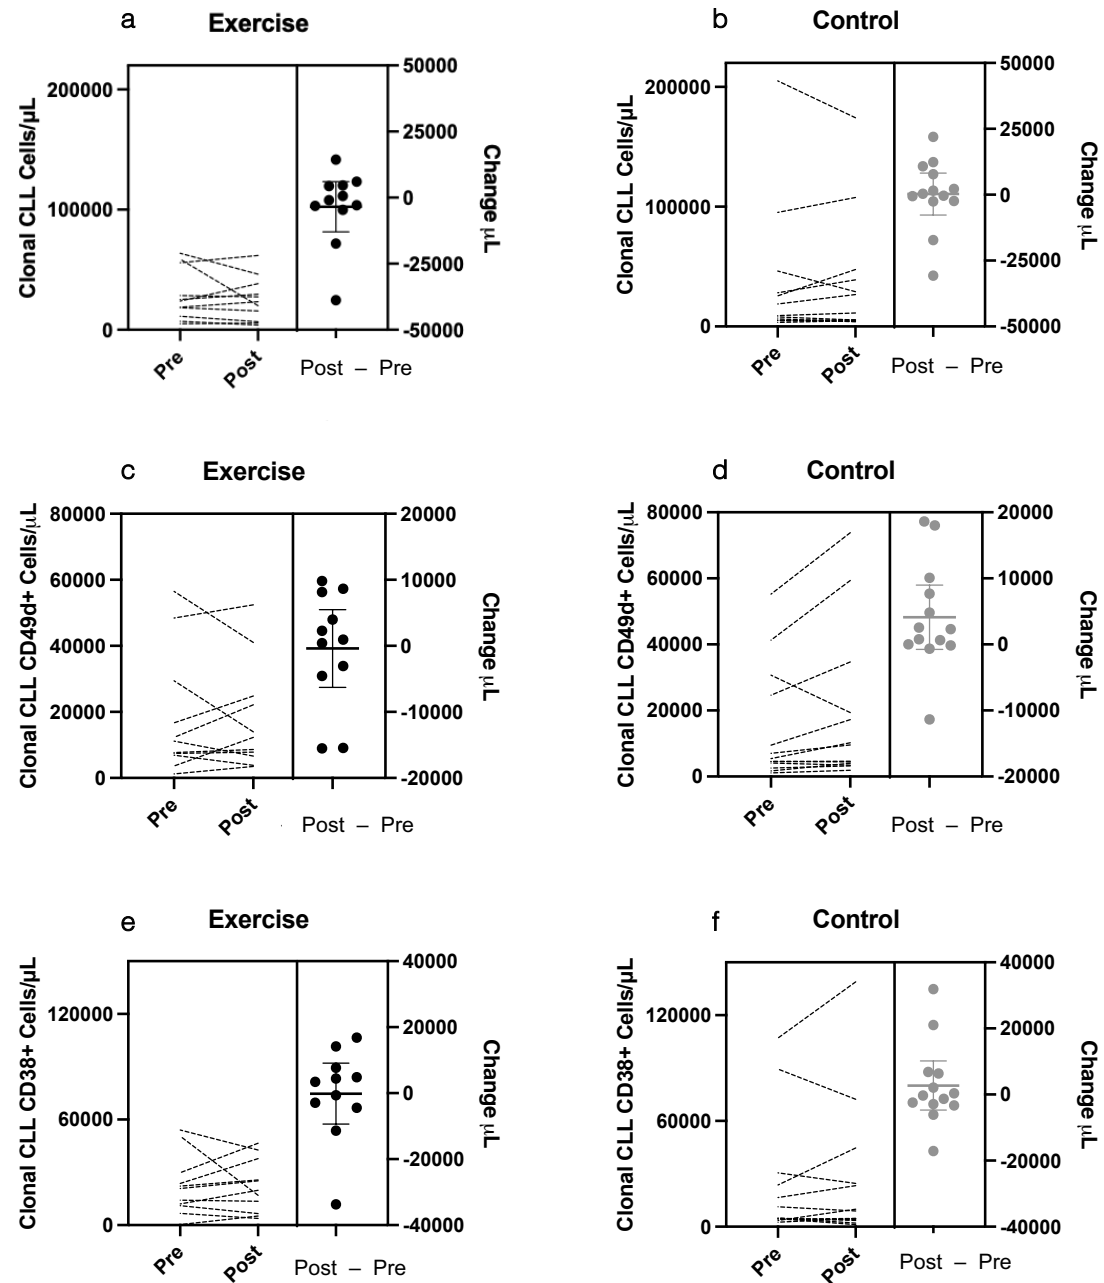

Supplement: Image1.pdf [file Image1.pdf]
